# Supplementary material for: Interprofessional collaboration in nursing homes (interprof): development and piloting of measures to improve interprofessional collaboration and communication: a qualitative multicentre study
Source: PubMed Central journal article supplement (PMC5765653; doi:10.1186/s12875-017-0678-1), 2018-01-11
Supplement: 12875_2017_678_MOESM2_ESM.pdf [file 12875_2017_678_MOESM2_ESM.pdf]

### Interview guideline study part 3

#### Interview guideline pilot study interviews nurses and GPs

---

|                                        |                                                                                                                                                                                                                                                                                                                                                                                                                                                                                                                                                                                                                                                                                         |
|----------------------------------------|-----------------------------------------------------------------------------------------------------------------------------------------------------------------------------------------------------------------------------------------------------------------------------------------------------------------------------------------------------------------------------------------------------------------------------------------------------------------------------------------------------------------------------------------------------------------------------------------------------------------------------------------------------------------------------------------|
| <b>Measures</b>                        | <p>How did you experience the interprofessional collaboration since the implementation? Which experiences did you make? What has changed?</p> <p>In which of the measures have you been involved actively?</p> <p>How were the measures set in action? Was measure a,b,c... feasible?</p> <p>Were there differences in the feasibility of the measures?</p> <p>How useful was the measure a,b,c...in your daily work?</p> <p>Where do you see the use of measure a,b,c...?</p> <p>Which influence had measure a,b,c... on the provision of medical care of the residents – in your opinion?</p> <p>If so, in what way did the residents realise the implementation of the measures?</p> |
| <b>Interprofessional collaboration</b> | <p>In your opinion- has there been a change in the quality of interprofessional collaboration due to the implementation of the measures? If yes, what has changed?</p> <p>How did you experience the collaboration with the nurse/GP?</p>                                                                                                                                                                                                                                                                                                                                                                                                                                               |
| <b>Assessment</b>                      | <p>What will happen to the measures from now on?</p> <p>What could still be improved?</p> <p>Which overall assessment would you give?</p> <p>Is there something you would like to say additionally?</p>                                                                                                                                                                                                                                                                                                                                                                                                                                                                                 |

---
