# Supplementary material for: Interprofessional collaboration in nursing homes (interprof): development and piloting of measures to improve interprofessional collaboration and communication: a qualitative multicentre study
Source: PubMed Central journal article supplement (PMC5765653; doi:10.1186/s12875-017-0678-1), 2018-01-11
Supplement: 12875_2017_678_MOESM4_ESM.pdf [file 12875_2017_678_MOESM4_ESM.pdf]

**Accessibility of GP/nurse**

**Monoprofessional focus groups – summary of results Göttingen, Mannheim, Hamburg**

| Problem                                                                                                                                                                                                                                                                                                                                                                                           | Solution                                                                                                                                                                                                                                                                                                                                                                                                                                                                            |
|---------------------------------------------------------------------------------------------------------------------------------------------------------------------------------------------------------------------------------------------------------------------------------------------------------------------------------------------------------------------------------------------------|-------------------------------------------------------------------------------------------------------------------------------------------------------------------------------------------------------------------------------------------------------------------------------------------------------------------------------------------------------------------------------------------------------------------------------------------------------------------------------------|
| <p><b>Accessibility of GP</b></p> <p>Massive efforts to reach GP via telephone</p> <p>Only few opportunities to talk to GP</p> <p>Processes in the GP’s practice delay the availability</p> <p>Nurse has no influence on options in the practice (waiting for a call back, waiting to talk to the GP)</p> <p><b>Accessibility of nurse</b></p> <p>Only few opportunities to talk to the nurse</p> | <p>Immediate, reliable reactions to important issues</p> <p>Set telephone hours</p> <p>24 hours availability of GP/private mobile number</p> <p>Communication via fax</p> <p>Communication via internet (exchange of photos)</p> <p>Communication via smartphone (face time, per video)</p> <p>Better integration of the practice nurse</p> <p>Communication via fax</p> <p>One smartphone/ transportable telephone per floor</p> <p>Cross shift contact person in nursing home</p> |
