# Supplementary material for: Interprofessional collaboration in nursing homes (interprof): development and piloting of measures to improve interprofessional collaboration and communication: a qualitative multicentre study
Source: PubMed Central journal article supplement (PMC5765653; doi:10.1186/s12875-017-0678-1), 2018-01-11
Supplement: 12875_2017_678_MOESM5_ESM.pdf [file 12875_2017_678_MOESM5_ESM.pdf]

**Availability of GP (telephone, fax)**

**Interprofessional focus groups – summary of results from Göttingen, Mannheim, Hamburg**

|                                                                                                                                                                                                                                                        |                                                                                                                                                                                                                                                                                                                                                                                                                                                                                                                                                                                                                                                                                                                                                                                                                                                                                                                                                                                      |
|--------------------------------------------------------------------------------------------------------------------------------------------------------------------------------------------------------------------------------------------------------|--------------------------------------------------------------------------------------------------------------------------------------------------------------------------------------------------------------------------------------------------------------------------------------------------------------------------------------------------------------------------------------------------------------------------------------------------------------------------------------------------------------------------------------------------------------------------------------------------------------------------------------------------------------------------------------------------------------------------------------------------------------------------------------------------------------------------------------------------------------------------------------------------------------------------------------------------------------------------------------|
| <p><b>Implementation:</b><br/>                 Agreement of communication path between practice and nursing home<br/>                 Precondition: Both sides need to want it<br/>                 Availability of GP in joint practice is higher</p> |                                                                                                                                                                                                                                                                                                                                                                                                                                                                                                                                                                                                                                                                                                                                                                                                                                                                                                                                                                                      |
| <p><b>Telephone</b><br/>....</p>                                                                                                                                                                                                                       | <p><b>Fax</b><br/>                 Mainly wish for communication via fax<br/>                 Additional availability via telephone at fix times or in case of emergency<br/>                 GPs “educate” nursing homes to use fax more</p>                                                                                                                                                                                                                                                                                                                                                                                                                                                                                                                                                                                                                                                                                                                                        |
| ....                                                                                                                                                                                                                                                   | <p><b>Content</b><br/>                 Summary of telephone call (nursing home should fax results of telephone call to GP)<br/>                 Results of the GP home visit<br/>                 Forwarding of specific information<br/>                 Request for a call back (GP)- (deescalation of situation often possible)<br/>                 Using the label “urgent” leads to a home visit</p>                                                                                                                                                                                                                                                                                                                                                                                                                                                                                                                                                                           |
| ...                                                                                                                                                                                                                                                    | <p><b>Time</b><br/>                 Quick reaction via fax possible<br/>                 Not time-consuming (quick to read, quick to answer)</p>                                                                                                                                                                                                                                                                                                                                                                                                                                                                                                                                                                                                                                                                                                                                                                                                                                     |
| ...                                                                                                                                                                                                                                                    | <p><b>Advantages</b><br/> <b>GPs</b><br/>                 Fax for communication during practice opening hours<br/>                 Documentation for legal purposes<br/>                 Fax provides more options to decide<br/>                 Nurses have more time to consider; no waste of time for GP<br/> <b>Nurses</b><br/>                 Problem can be described immediately<br/>                 Instructions from GP in written form<br/>                 Fax is feasible<br/>                 Fax fits better in working procedures<br/>                 Signing of initials of nurses prevents redundant work<br/> <b>Practice nurse</b><br/>                 Processes the fax requests from the nursing homes<br/>                 Prioritisation of the requests, important requests on GP’s desk, less important into a filing basket for further processing<br/> <b>Generally</b><br/>                 Fax as legal certainty, fax is easier for everybody</p> |
|                                                                                                                                                                                                                                                        | <p><b>Disadvantages GP</b><br/>                 Irrelevant requests (only important to Medical Service of Health Insurers)<br/>                 Waste of paper<br/>                 Practice organization: GP does not want to be disturbed during opening hours</p>                                                                                                                                                                                                                                                                                                                                                                                                                                                                                                                                                                                                                                                                                                                 |
|                                                                                                                                                                                                                                                        | <p><b>Wish: establishment of fax culture/obligatory processes</b><br/>                 Preparation of the home visit: nurses should fax to GP for a better preparation (number of residents, formalities, necessary devices)<br/>                 Standardized fax forms from GP practice<br/>                 Suggested prescriptions on the fax to ease the process in advance<br/>                 If no fax arrives, the GP must not visit the nursing home<br/>                 Faxes are more predictable, if a regular home visit day exists</p>                                                                                                                                                                                                                                                                                                                                                                                                                              |
|                                                                                                                                                                                                                                                        | <p><b>Resources</b><br/>                 Availability of faxes to nursing station, fax with high resolution</p>                                                                                                                                                                                                                                                                                                                                                                                                                                                                                                                                                                                                                                                                                                                                                                                                                                                                      |
