# Supplementary material for: Interprofessional collaboration in nursing homes (interprof): development and piloting of measures to improve interprofessional collaboration and communication: a qualitative multicentre study
Source: PubMed Central journal article supplement (PMC5765653; doi:10.1186/s12875-017-0678-1), 2018-01-11

Additional file 7  
expert workshop:  
availability- FAX

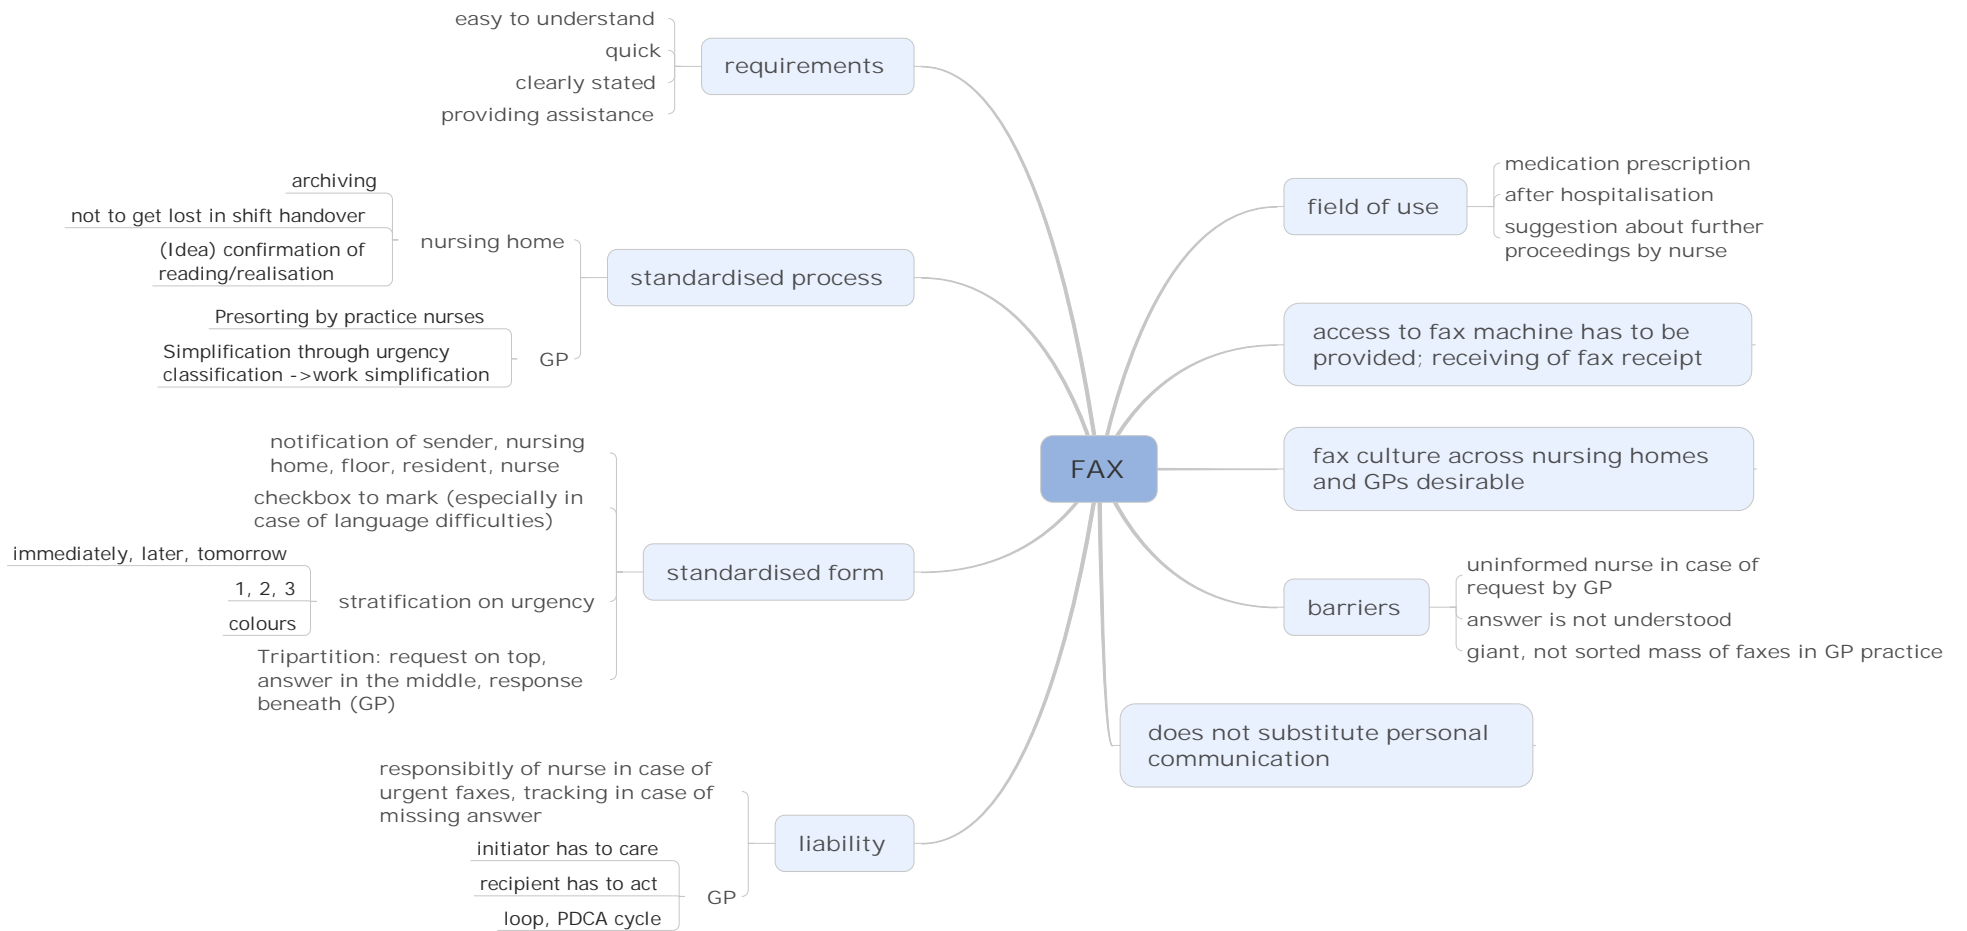

Supplement: 12875_2017_678_MOESM6_ESM.pdf [file 12875_2017_678_MOESM6_ESM.pdf]
