# Supplementary material for: Interprofessional collaboration in nursing homes (interprof): development and piloting of measures to improve interprofessional collaboration and communication: a qualitative multicentre study
Source: PubMed Central journal article supplement (PMC5765653; doi:10.1186/s12875-017-0678-1), 2018-01-11
Supplement: 12875_2017_678_MOESM7_ESM.pdf [file 12875_2017_678_MOESM7_ESM.pdf]

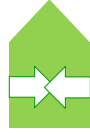

# FAX

urgent/ immediately     during the next half day     today     this week

**resident:** \_\_\_\_\_ **date of birth:** \_\_\_\_\_ **date, time FAX:**

**nursing home:** \_\_\_\_\_ **GP:** \_\_\_\_\_

floor:

nurse:

telephone number: \_\_\_\_\_ until: \_\_\_\_\_

---

## REQUEST/ NOTICE

medication                       before home visit                       other

please send confirmation of acknowledgement (when indicated without detailed answer)

return confirmation acknowledgement

**date, time FAX:**

## ANSWER

please send confirmation of acknowledgement (when indicated without detailed answer)

return confirmation acknowledgement

## ACTION

**answer received, date, time:**

**initials:**

Comments
